# Supplementary material for: Foliar Application of Nano, Chelated, and Conventional Iron Forms Enhanced Growth, Nutritional Status, Fruiting Aspects, and Fruit Quality of Washington Navel Orange Trees (Citrus sinensis L. Osbeck)
Source: MDPI journal article supplement (doi:10.3390/plants10122577), 2021-11-25
Supplement: s1 [file s1]

Table S1. Soil physical and chemical properties prior to the first season 2019

| Soil property                         | Value      | Soil property                                     | Value  |                               |     |
|---------------------------------------|------------|---------------------------------------------------|--------|-------------------------------|-----|
| <u>Particle size distribution (%)</u> |            | Soluble ions (mmol <sub>c</sub> L <sup>-1</sup> ) |        |                               |     |
|                                       |            | Cations                                           | Anions |                               |     |
| Coarse sand                           | 11.0       | Ca <sup>2+</sup>                                  | 6.8    | CO <sub>3</sub> <sup>2-</sup> | 0.0 |
| Fine sand                             | 19.4       | Mg <sup>2+</sup>                                  | 3.2    | HCO <sub>3</sub> <sup>-</sup> | 4.5 |
| Silt                                  | 20.2       | Na <sup>+</sup>                                   | 4.3    | Cl <sup>-</sup>               | 6.4 |
| Clay                                  | 49.4       | K <sup>+</sup>                                    | 1.8    | SO <sub>4</sub> <sup>2-</sup> | 5.2 |
| Texture class*                        | Heavy Clay | Nutrients (mg kg <sup>-1</sup> )                  |        |                               |     |
| Soil pH (1:2:5 w/v – soil/water)      | 7.8        |                                                   |        |                               |     |
| EC (dS m <sup>-1</sup> )              | 1.65       | N                                                 |        |                               | 119 |
| OM (%)                                | 12         | P                                                 |        |                               | 7.4 |
| Calcium carbonate (%)                 | 23         | K                                                 |        |                               | 57  |
|                                       |            | Cu                                                |        |                               | 2.3 |
|                                       |            | Zn                                                |        |                               | 4.3 |
|                                       |            | Fe                                                |        |                               | 2.2 |

\* texture class is according to international soil triangle; O.M: soil organic matter; EC: soil electrical conductivity

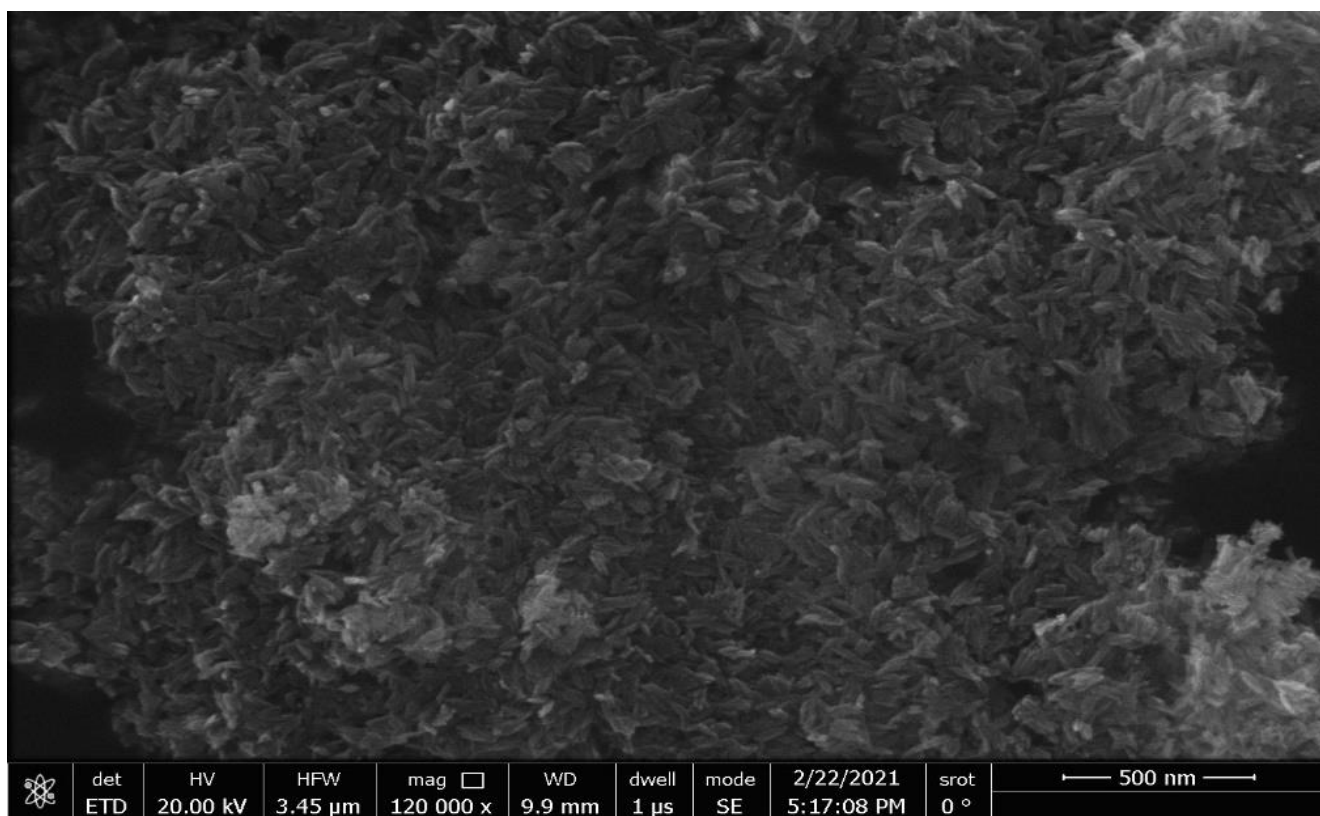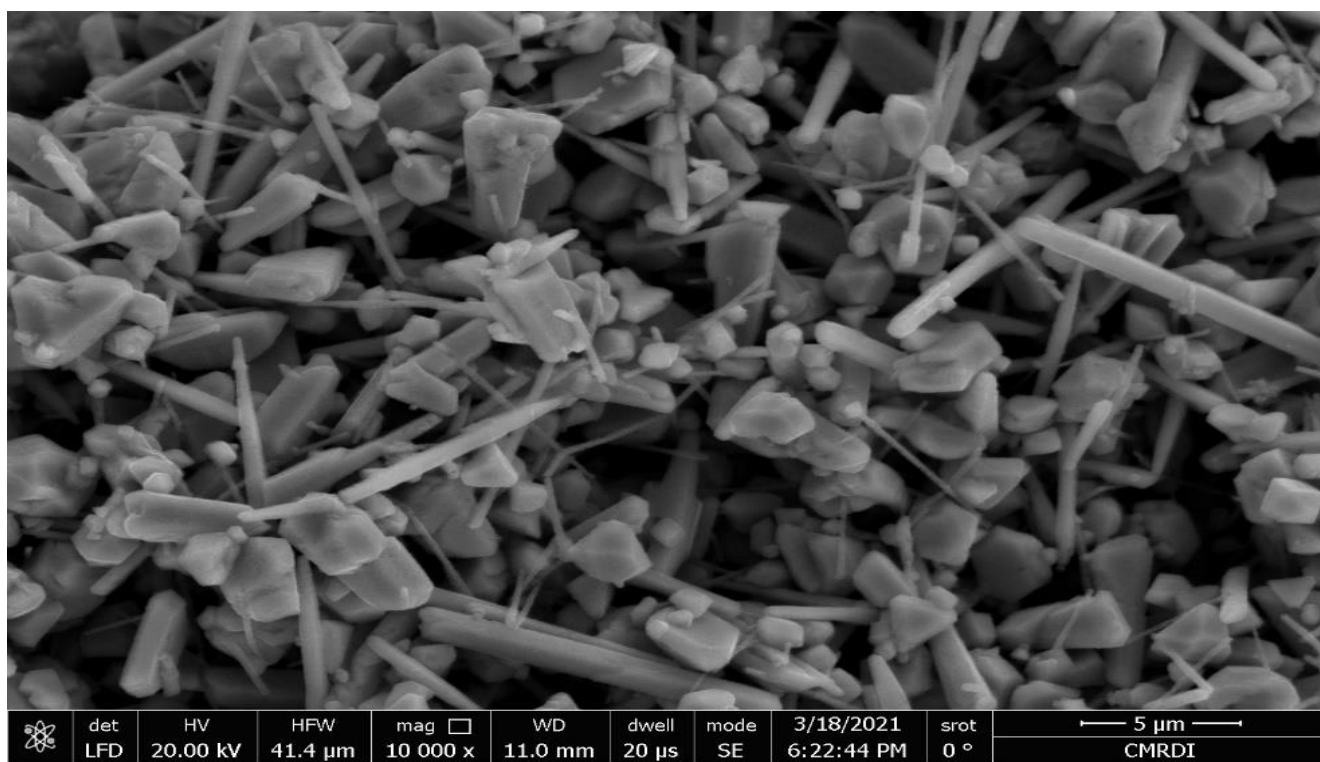

Figure S1. Scanning electron microscopy (SEM) images of the prepared Fe-NPs

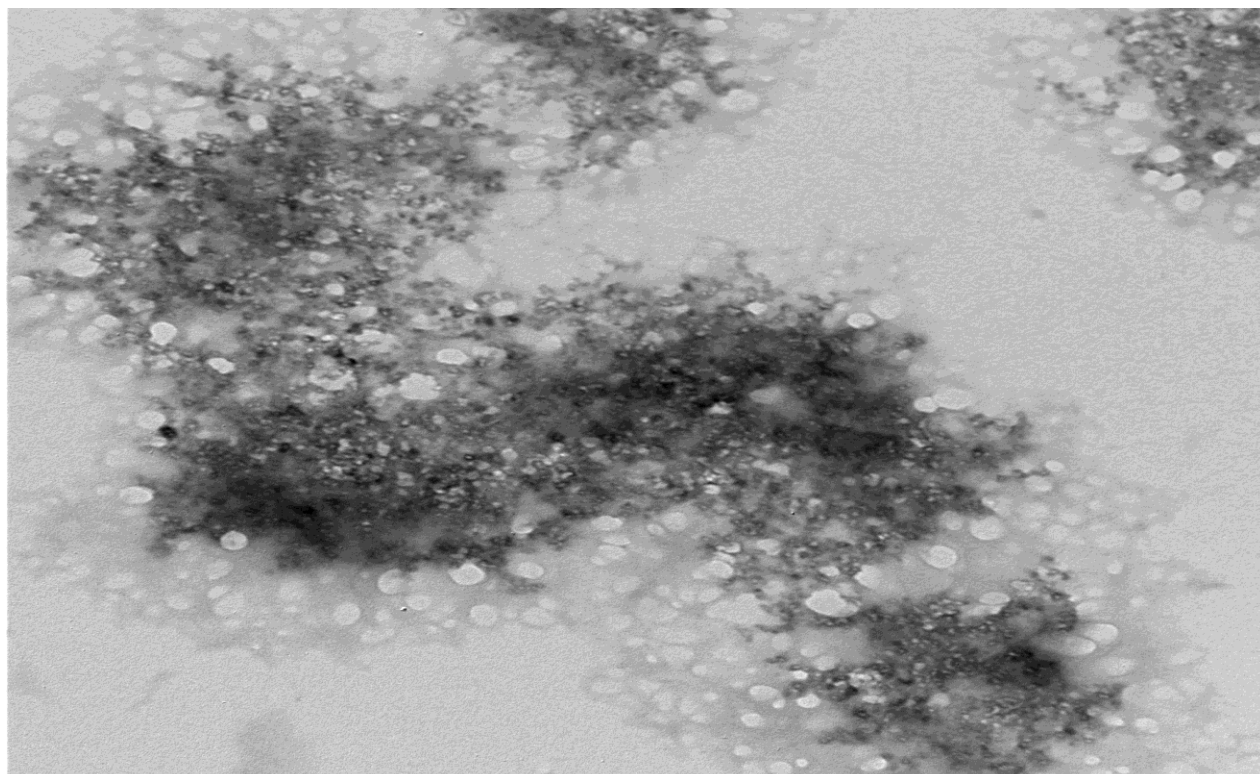

25.tif  
Print Mag: 105000x @ 211 mm  
TEM Mode: Imaging

100 nm  
HV=80.0kV  
Direct Mag: 50000x

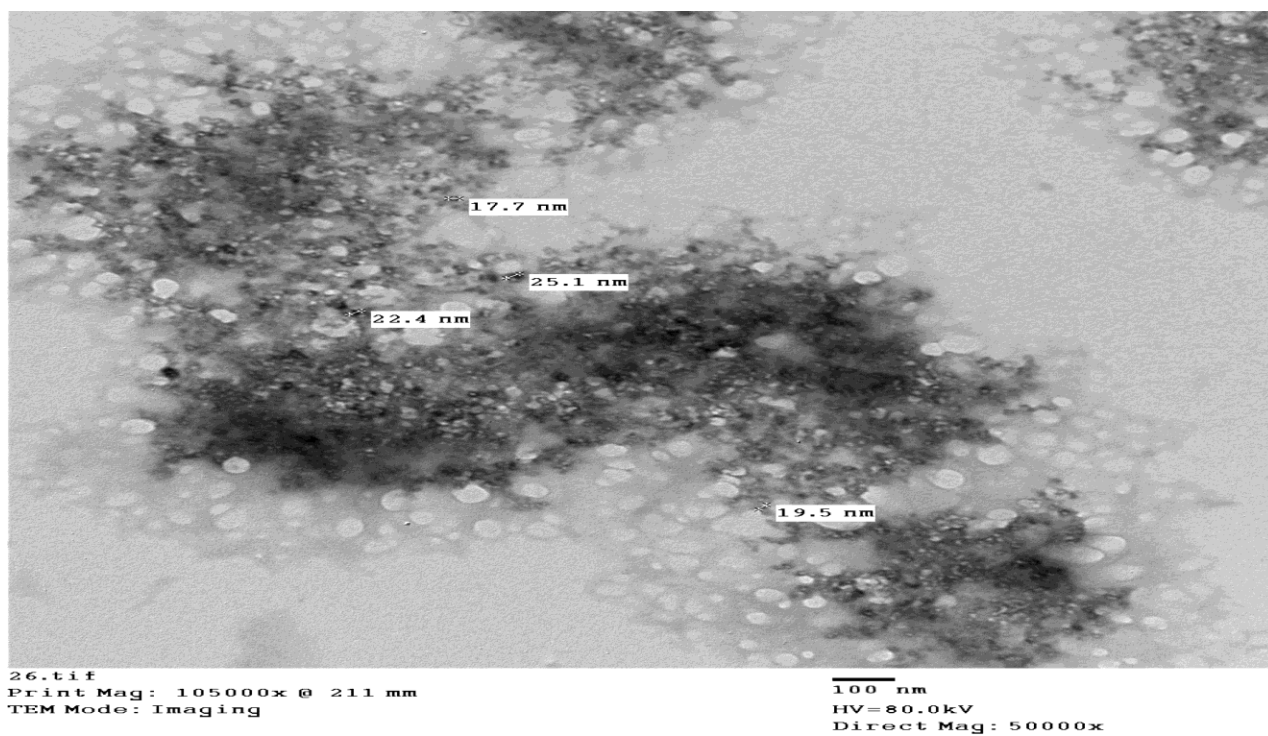

Figure S2 TEM micrograph of prepared Fe nanoparticles

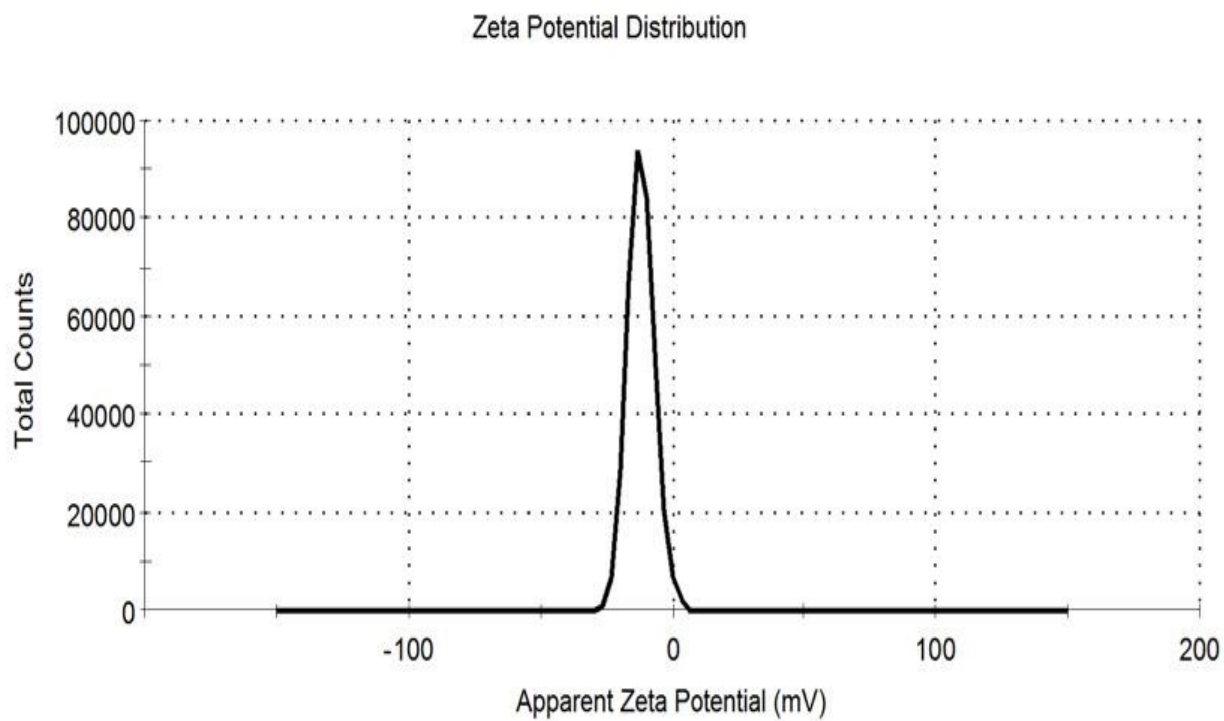

Figure S3. Zeta potential of the iron nanoparticles

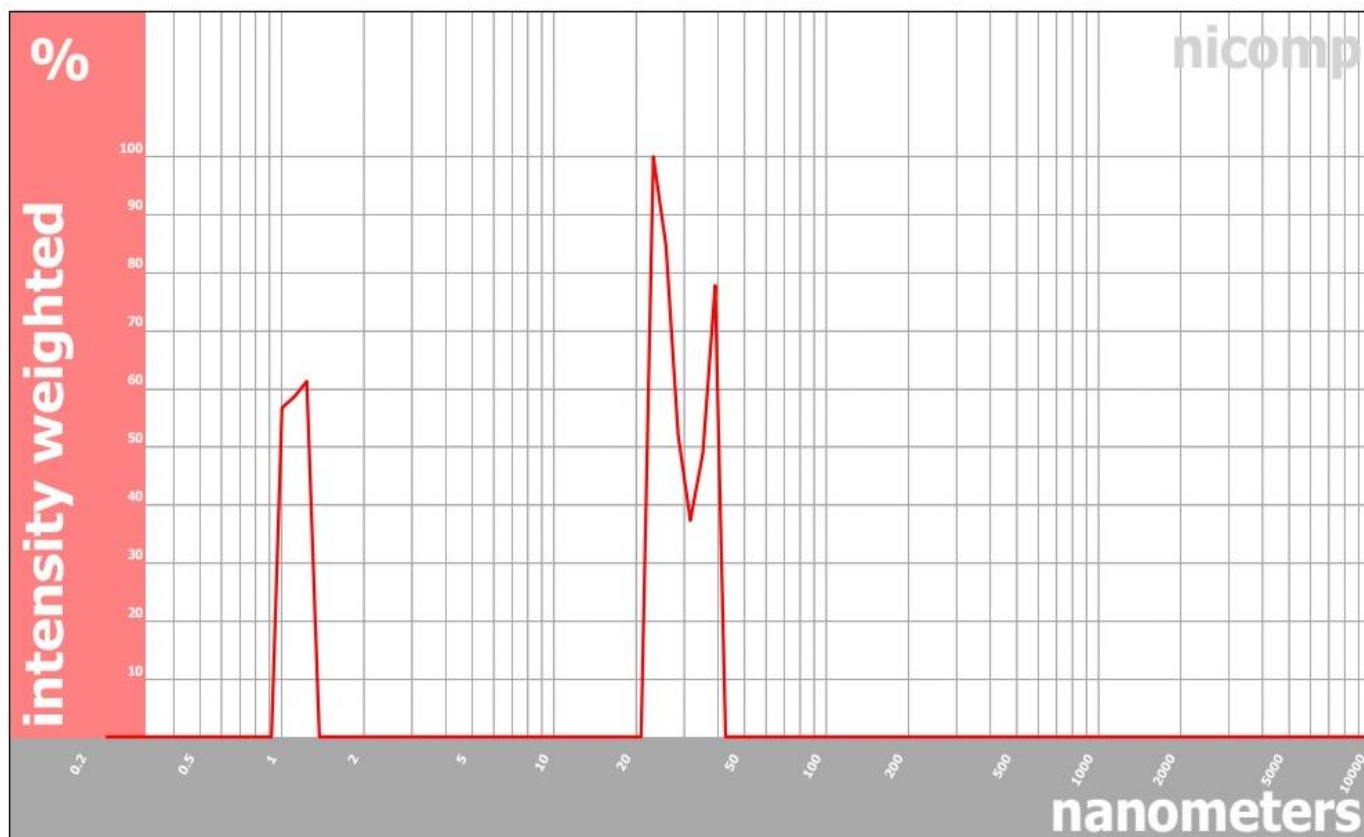

Figure S4. Dynamic light scattering (DLS)
